## RESEARCH ARTICLE

# Construction of the Digital Health Equity-Focused Implementation Research Conceptual Model - Bridging the Divide Between Equity-focused Digital Health and Implementation Research

Lisa L. Groom <sup>1,2\*</sup>, Antoinette M. Schoenthaler<sup>3,4</sup>, Devin M. Mann<sup>2,4</sup>, Abraham A. Brody <sup>1,5</sup>

**1** Rory Meyers College of Nursing, New York University, New York, New York, United States of America, **2** Medical Center Information Technology Department of Health Informatics, New York University Langone Health, New York, New York, United States of America, **3** Institute for Excellence in Health Equity, New York University Langone Health, New York, New York, United States of America, **4** Department of Population Health, New York University Grossman School of Medicine, New York, New York, United States of America, **5** Division of Geriatric Medicine and Palliative Care, New York University Grossman School of Medicine, New York, New York, United States of America

\* [llg322@nyu.edu](mailto:llg322@nyu.edu)

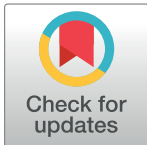

## OPEN ACCESS

**Citation:** Groom LL, Schoenthaler AM, Mann DM, Brody AA (2024) Construction of the Digital Health Equity-Focused Implementation Research Conceptual Model - Bridging the Divide Between Equity-focused Digital Health and Implementation Research. *PLoS Digit Health* 3(5): e0000509. <https://doi.org/10.1371/journal.pdig.0000509>

**Editor:** Jennifer N. Avari Silva, Washington University in Saint Louis, UNITED STATES

**Received:** July 28, 2023

**Accepted:** April 10, 2024

**Published:** May 22, 2024

**Copyright:** © 2024 Groom et al. This is an open access article distributed under the terms of the [Creative Commons Attribution License](https://creativecommons.org/licenses/by/4.0/), which permits unrestricted use, distribution, and reproduction in any medium, provided the original author and source are credited.

**Data Availability Statement:** All relevant data are within the paper.

**Funding:** The author(s) received no specific funding for this work.

**Competing interests:** The authors have declared that no competing interests exist.

## Abstract

Digital health implementations and investments continue to expand. As the reliance on digital health increases, it is imperative to implement technologies with inclusive and accessible approaches. A conceptual model can be used to guide equity-focused digital health implementations to improve suitability and uptake in diverse populations. The objective of this study is expand an implementation model with recommendations on the equitable implementation of new digital health technologies. The Digital Health Equity-Focused Implementation Research (DH-EquIR) conceptual model was developed based on a rigorous review of digital health implementation and health equity literature. The Equity-Focused Implementation Research for Health Programs (EquIR) model was used as a starting point and merged with digital equity and digital health implementation models. Existing theoretical frameworks and models were appraised as well as individual equity-sensitive implementation studies. Patient and program-related concepts related to digital equity, digital health implementation, and assessment of social/digital determinants of health were included. Sixty-two articles were analyzed to inform the adaptation of the EquIR model for digital health. These articles included digital health equity models and frameworks, digital health implementation models and frameworks, research articles, guidelines, and concept analyses. Concepts were organized into EquIR conceptual groupings, including population health status, planning the program, designing the program, implementing the program, and equity-focused implementation outcomes. The adapted DH-EquIR conceptual model diagram was created as well as detailed tables displaying related equity concepts, evidence gaps in source articles, and analysis of existing equity-related models and tools. The DH-EquIR model serves to guide digital health developers and implementation specialists to promote

the inclusion of health-equity planning in every phase of implementation. In addition, it can assist researchers and product developers to avoid repeating the mistakes that have led to inequities in the implementation of digital health across populations.

### Author summary

Digital health is becoming increasingly prevalent in our society, and it is essential that these technologies are designed with inclusivity and accessibility in mind. There are currently no comprehensive implementation models in digital health geared towards equity. To address this need, we developed a conceptual model called the Digital Health Equity-Focused Research Implementation framework. We completed a comprehensive review of existing literature on digital health implementation and digital health equity. The model merges the findings from this review into the existing Equity-focused Implementation Research model. The resulting digital health equity-focused implementation framework consists of five phases: assessing population health status, planning the program, designing the program, implementing the program, and equity-based outcomes. By promoting inclusivity and accessibility, the framework has the potential to improve the suitability and uptake of digital health technologies in diverse communities. By following this framework, researchers and developers can ensure that digital health equity planning is integrated into every step of the implementation process.

## Introduction

Digital health interventions can provide benefits including reductions in readmissions and improved physical and emotional quality of life health outcomes [1]. In the United States, record amounts of private investment dollars have flowed into digital health startups; in 2020 digital health investments topped \$9.2 billion domestically and \$14.2 billion globally [2]. Meanwhile, there have been large investments in health technology through federal and state governments, including \$80 million in American Rescue Plan funding to strengthen U.S. public health information technology [3]. In addition, the Centers for Medicare and Medicaid Services expanded reimbursement beyond remote patient monitoring, including monitoring non-physiological outcomes such as adherence to physical therapy [4]. In light of this insurance coverage and the evidence that digital health can improve clinical outcomes, reduce costs, and improve patient engagement, it is imperative that research and operational implementors ensure that the interventions are accessible and increase equity rather than widening inequities in outcomes [5].

“Disparity” and “inequity” are distinct concepts—disparity describes a difference, while inequity describes unfairness and injustice [6]. In the U.S. the use of the term disparity ranges from suggesting a value-free difference to a value-laden unfair judgment. This paper will focus on inequities, as inequities are differences that are unjust and should be rectified.

Striking health inequities continue to plague the United States healthcare system. Inequities persist across socioeconomic (SES) levels [7]. Previous work has shown how implicit bias and systemic racism has impacted clinical outcomes for minoritized patients [8]. Implicit bias refers to the unconscious attitudes or stereotypes that affect an individual’s understanding, actions, and decisions in an unintentional manner. This impacts patients through the unconscious biases of healthcare providers and the influence of those biases on assessment and treatment decisions [8]. Systemic racism is associated with poorer physical health, and race is a

social determinant of health (SDOH) [9]. SDOH encompass domains that influence health inequities including employment, housing instability, language and literacy, and environmental conditions [10]. Limited access to healthcare services and reduced access to healthier food and lifestyle choices also result in populations experiencing poorer health [10].

Digital health implementations can increase health inequities. Termed the “digital divide,” lack of access to technology have been reported in racial and ethnic minoritized populations, individuals with disabilities, limited English proficiency, living in rural areas, and those with low income [11]. Intervention-generated inequity occurs when an intervention disproportionately benefits advantaged people due to inequalities in access, uptake, adherence, and effectiveness [12]. For example, patients may lack internet access, preventing them from using a patient portal. Furthermore, some patients may have limited internet access through cellular data plans. In remote and rural areas, the available internet access options may be of limited bandwidth. Limited access to internet resources can result in intervention-generated inequity, where patients in underserved areas with limited connectivity may encounter challenges scheduling virtual appointments. Digital health tools that require virtual appointments are then benefitting only persons with sufficient bandwidth. On the other hand, when digital technologies are carefully planned and implemented using an inclusive approach to development, inequities may be diminished [13].

Persistent inequities exist in the development of digital health and other technologies. Technology development has typically included predominantly white user research participants, a systematic bias that could lead to potential harms [14–16]. The lack of a diverse sample during development phases results in flawed products, or products that are difficult or unappealing for minoritized populations to use. Seniors, people with disabilities, and people with limited English proficiency may struggle to use applications without proper inclusive and accessible designs [12,17]. There is a paucity of research of socioculturally tailored digital health interventions that incorporate design based on input from minoritized populations [13]. Example results of engagement in design include actors who are relatable to the user population in photographs and videos [18]. Communication patterns and health literacy levels are important considerations, as persons with low health literacy have higher rates of chronic disease than those with adequate literacy [19]. Prior user-centered design work crafted motivational text messages in English and Spanish for persons with low literacy levels to increase physical activity [20]. A scoping review of digital health studies found that persons with disabilities were rarely included, leading to non-accessible applications [21].

A limited, but increasing, number of studies investigate technology implementations in disadvantaged populations. Effective interventions must encompass acceptability (through user acceptance testing), practicality, and be designed to address the needs of at-risk populations [22,23]. The emergence of equity-focused digital health research models have helped improve the delivery of more inclusive healthcare. The adoption-focused Integrative Model of eHealth Use was updated to include health literacy and computer literacy, and the eHealth Equity Framework incorporates technology access, material circumstances, and societal values [24,25]. Health equity factors such as poor engagement with digital health, health policies, and digital determinants of health (e.g. digital literacy, lack of internet access) are examined in the Digital Health Equity Framework, which focuses on access and adoption [26]. An equity-focused behavioral science model called the ConNECT Framework integrates context, fosters inclusion, and prioritizes training of healthcare providers and implementors to improve health equity [27]. The above models include incomplete equity concepts in relation to implementation, focusing on a particular phase or aspect of an implementation. This paper therefore develops a broader implementation model that increases focus on causes of inequities in digital health implementations from planning to outcome tracking.

Few equity-focused implementation models exist to date though there are many general implementation frameworks available to researchers [28,29]. The Equity-Focused Implementation Research for Health Programs (EquIR) model was developed in 2019 and enables researchers and executives to incorporate equity considerations during the entire implementation process from the initial planning phase through to evaluation [30]. EquIR's from-planning-to-outcome scope, as well as its focus on providing solutions to equity challenges sets it apart from the Consolidated Framework for Implementation Research (CFIR) [31]. The CFIR model is a determinants framework; meaning it was designed to guide the systematic evaluation of factors influencing implementations of programs in various settings in the domains of intervention characteristics, outer setting, inner setting, characteristics of individuals, and process. The CFIR model was updated to include human-equality centeredness, but does not include steps informing how to alleviate said inequalities [30,31]. Besides EquIR and CFIR, other equity-focused implementation frameworks include The Transcreation Framework and the Health Equity Implementation Framework [22,28].

EquIR was designed by implementation researchers, health equity experts, and results from a systematic review. It is cyclical in nature; beginning with equity-focused population health status and ending with a new post-implementation population health status. It includes five progressive phases: population assessment, planning, designing, implementing, and equity-focused implementation outcomes [30]. Each phase includes direction for incorporating equity issues and approaches to diminish them. As it is a relatively new model, the applications to date are limited. However, the EquIR framework was used to investigate challenges that impact gerontology researcher-community partnerships and to generate potential solutions to obstacles [32].

There is a need for a digital health implementation model that similarly supports equity-focus throughout all phases of digital health planning and implementation. The purpose of this paper is to modify EquIR to include constructs from digital health implementation frameworks, thereby creating recommendations on the equitable implementation of new digital health technologies.

## Methods

The digital health and equity-focused implementation model (DH-EquIR) builds on the original EquIR model by integrating digital health implementation into the conceptualization of equitable implementations. DH-EquIR was designed by identifying patient and program-related factors contributing to the successful implementation of digital health technologies. We conducted a narrative review following the Scale for the Assessment of Narrative Review Articles [33] to comprehensively describe and interpret previously published literature on digital health implementation models incorporating concepts of health equity [34]. A literature synthesis table was created with each EquIR construct as a header. As each digital health implementation study was reviewed, digital health concepts that related to constructs from the original EquIR model were inserted into the literature synthesis table. These patient- and program-related implementation factors were then fused into the EquIR model to create an adaptation capable of guiding equity-focused digital health implementations. The lead author conducted the primary synthesis of results. The other authors, who all have extensive knowledge of the material, then gave feedback on the contents.

## Search strategy

Articles were found via database searches, reference lists, expert literature, and current practice guideline review. Literature searches (PubMed, CINAHL, Google Scholar) were conducted

August 2022 through May 2023 and included medical subject heading (MeSH) terms: *Cultural Diversity, Minority Groups, Minority Health, Healthcare Disparities, Health Status and Disparities*. Additional search terms included: *health equity, disparit\**, *health technology, digital health, mhealth, adoption, conceptual framework, conceptual model, implementation science, implementation research, and translational research*. A medical librarian was consulted for the search strategy. The MEDLINE/PubMed Health Disparities and Minority Health Search Strategy [35] query was used in combination with search terms: *Mobile Applications [Mesh], Telemedicine [Mesh], Remote Sensing Technology [Mesh], "digital health"[TW], "mhealth"[TW], "virtual health"[TW], "smartphone\*"[TW], and "implementation\*"[TW]*.

The “D&I Models in Health Research and Practice” website (<https://dissemination-implementation.org>) was used to explore theories, models, and frameworks that involved both health equity and implementation research.

### Inclusion and exclusion criteria

The search included English language articles published from January 2017 through May 2023; international studies were included. Primary research, systematic reviews, and scoping reviews covering health equity, implementation frameworks, and digital health implementations were included. Individual primary research studies were required to involve patients as the focus. Exclusion criteria omitted clinician-focused articles, conference abstracts, editorial and opinion articles, magazine articles, and protocol proposals.

### Conceptual model

Equity-focused recommendations and observations were extracted from the available articles and organized by the original EquIR model's constructs, which may be viewed in its original publication [30]. Digital health planning-related factors were those related to the identification of disadvantaged groups, the quantification of health inequities, and the identification of equity-sensitive recommendations. Similarly, relevant digital health literature was incorporated into the process of designing an intervention and the identification of key actors, barriers, and facilitators to equity-focused recommendations. The implementing EquIR phase was augmented with concepts from digital health implementations including communication plans, the definition of resources and incentives, strategies to overcome barriers, and monitoring and evaluation strategies for digital health. Equity-focused implementation outcomes included digital health monitoring metrics and strategies. While keeping the original EquIR model's visual structure, the DH-EquIR model revised the constructs to be digital health equity implementation-focused based on the data extracted from the source articles.

## Results

### Adapted conceptual model

The Preferred Reporting Items for Systematic Reviews and Meta-Analyses (PRISMA) diagram is shown in Fig 1. Sixty-two articles were reviewed including existing digital health equity conceptual models and frameworks, digital health implementation models and frameworks, research articles, guidelines, and concept analyses. Digital health models included CFIR, the Technology Acceptance Model (TAM), unified theory of acceptance and use of technology (UTAUT), and the Integrated Technology Implementation Model (ITIM) [36–38]. Health equity models included the Digital Health Equity Framework (DHEF), the Framework for Digital Health Equity, and the Equity Checklist for Health Technology Assessment (ECHTA) [26,39,40]. Research articles include systematic reviews of barriers and facilitators to digital

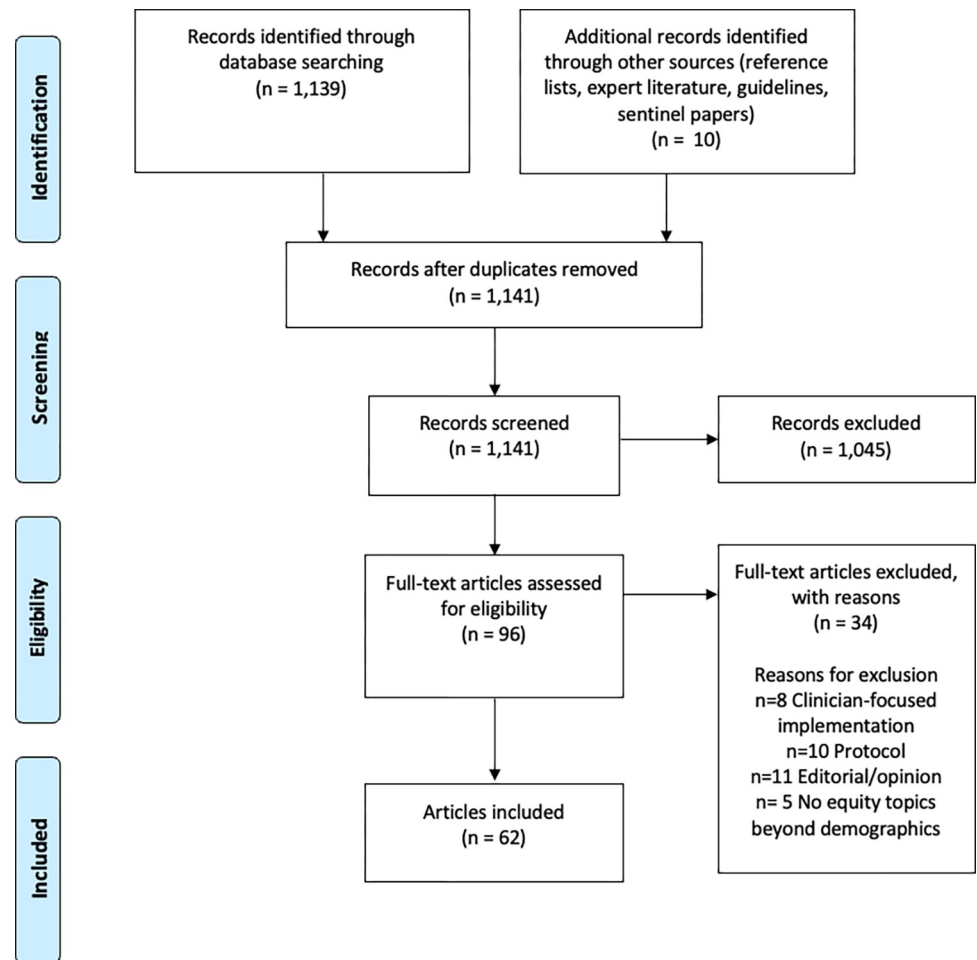

From: Moher D, Liberati A, Tetzlaff J, Altman DG, The PRISMA Group (2009). Preferred Reporting Items for Systematic Reviews and Meta-Analyses: The PRISMA Statement. *PLoS Med* 6(7): e1000097. doi:10.1371/journal.pmed1000097

For more information, visit [www.prisma-statement.org](http://www.prisma-statement.org).

**Fig 1. –PRISMA Diagram.**

<https://doi.org/10.1371/journal.pdig.0000509.g001>

health uptake, interventions to increase technology usage by vulnerable populations, and articles on inclusive design. [Table 1](#) includes details around implementation models and equity tools that were used to construct the DH-EquIR model. [Table 2](#) depicts concepts taken from each source as they relate to the original EquIR model, as well as implications for future research identified in the articles. [Table 3](#) includes exemplars of studies investigating equity issues within digital health implementation studies. The 17 exemplars were selected based on their inclusion of diverse patients and equity-focused recommendations. Additional specific examples of digital health implementation studies may be referenced in a scoping review of digital health interventions in ethnic-minoritized populations [41], a systematic review of interventions to increase patient portal use [42], and a systematic review of health and wellness technology use by historically underserved health consumers [43].

The DH-EquIR model ([Fig 2](#)) was created by incorporating the digital health concepts from the literature review into the corresponding location on the original EquIR model figure. In



**Table 1. Analysis of models, reviews, and equity tools: Relevant aspects included in the development of the DH-EquIR model.**

| Lead Author, Year  | Type / Model / Tool                                               | Aspects of equity                                                                                                                                     | Key Concepts for DH-EquIR Development                                                                                                                                                                                                                                                                                                                                                                                            |
|--------------------|-------------------------------------------------------------------|-------------------------------------------------------------------------------------------------------------------------------------------------------|----------------------------------------------------------------------------------------------------------------------------------------------------------------------------------------------------------------------------------------------------------------------------------------------------------------------------------------------------------------------------------------------------------------------------------|
| Benkhalti 2020     | Checklist to guide equity considerations                          | Checklist to include equity considerations in health technology assessment                                                                            | <ul style="list-style-type: none"> <li>• Define “equity of what?” (need, access, health status, function, prognosis, quality of life, SDOH)</li> <li>• Define subgroups of target population</li> <li>• Consider whether technology could lead to biases for or against specific populations</li> <li>• Engage disadvantaged community members as leaders to help define inequities</li> </ul>                                   |
| Ramasawmy 2022     | Scoping review                                                    | Inequality constructs map onto individual, provider/health care system, population/society, and intervention levels of action                         | <ul style="list-style-type: none"> <li>• Digital literacy, internet access, hardware</li> <li>• Lack of trust, fear of discrimination</li> <li>• Experiences with culturally insensitive clinician behavior, communication barriers, racism</li> </ul>                                                                                                                                                                           |
| Richardson 2022    | Framework for digital health equity                               | National Institute on Minority Health and Health Disparities Research Framework Expanded for Digital Health Equity                                    | <ul style="list-style-type: none"> <li>• Individual, interpersonal, community, and societal levels of influence of digital environment</li> </ul>                                                                                                                                                                                                                                                                                |
| Latulippe 2017     | Literature review                                                 | Strategies to reduce social health inequalities                                                                                                       | <ul style="list-style-type: none"> <li>• Respect cultural attributes of future users</li> <li>• Strategies to overcome barriers (subsidize phone plans, Wi-Fi hotspots, renting programs)</li> <li>• Translation features</li> <li>• Accessible technologies</li> <li>• Use of video instead of written materials for persons with low literacy skills</li> <li>• Volunteers to help older people with digital health</li> </ul> |
| Borsci 2018        | Human and Economic Resilience Design for Medical Technology model | Evaluation of unmet needs for technology development, human factors/user experience, realistic scenario development, monitoring/evaluation strategies | <ul style="list-style-type: none"> <li>• Value engineering</li> <li>• Economic evaluation</li> </ul>                                                                                                                                                                                                                                                                                                                             |
| Gemert-Pijnen 2011 | Center for eHealth Research model                                 | Socioeconomic                                                                                                                                         | <ul style="list-style-type: none"> <li>• Human-centered design principles</li> <li>• Value specification</li> </ul>                                                                                                                                                                                                                                                                                                              |
| Espay 2019         | Roadmap for the development of digital health tech                | Not applicable                                                                                                                                        | <ul style="list-style-type: none"> <li>• Determine benefit-to-burden ratio, digital health should be unobtrusive to patients</li> <li>• Solution should be visually intuitive</li> <li>• Interoperability</li> <li>• Need for sustainable financial model</li> <li>• Perceived privacy</li> </ul>                                                                                                                                |
| Schoville 2015     | Integrated Technology Implementation Model                        | Not applicable                                                                                                                                        | <ul style="list-style-type: none"> <li>• Facilitator (champion) that guides implementation</li> <li>• Leadership—executives, managers, and consultants that promote technology adoption</li> </ul>                                                                                                                                                                                                                               |
| Hess 2010          | Equity Implementation Model                                       | Model suggesting evaluation of individual and comparative net benefits of technology influencing intention to use                                     | <ul style="list-style-type: none"> <li>• Equity-self, equity-authority figure (does the clinic/org gain more than the patient), equity-other users (how patient compares self to others)</li> <li>• Acceptability</li> <li>• Adoption</li> </ul>                                                                                                                                                                                 |
| Davis 1989         | Technology Acceptance Model                                       | Not applicable                                                                                                                                        | <ul style="list-style-type: none"> <li>• Perceived usefulness/define monitoring and evaluation strategies</li> <li>• User experience scales/acceptability</li> </ul>                                                                                                                                                                                                                                                             |
| Venkatesh 2013     | Unified Theory of Acceptance and Use of Technology                | Not applicable                                                                                                                                        | <ul style="list-style-type: none"> <li>• Behavioral intention to use technology/acceptability</li> </ul>                                                                                                                                                                                                                                                                                                                         |
| Damschroder 2009   | Consolidated Framework For Implementation Research                | Not applicable                                                                                                                                        | <ul style="list-style-type: none"> <li>• Implementation research article on which original EquIR model is focused</li> <li>• Structure for identifying influences on implementation</li> <li>• Approaching complex, multi-level, interacting constructs key to implementation</li> </ul>                                                                                                                                         |
| Bodie 2008         | The Updated Integrative Model of eHealth Use                      | Health literacy                                                                                                                                       | <ul style="list-style-type: none"> <li>• Measurement of literacy</li> <li>• Health, digital literacy</li> <li>• Trust</li> </ul>                                                                                                                                                                                                                                                                                                 |

(Continued)

Table 1. (Continued)

| Lead Author, Year | Type / Model / Tool                    | Aspects of equity                                                                                           | Key Concepts for DH-EquIR Development                                                                                                                                                                                                                                                                                                                                  |
|-------------------|----------------------------------------|-------------------------------------------------------------------------------------------------------------|------------------------------------------------------------------------------------------------------------------------------------------------------------------------------------------------------------------------------------------------------------------------------------------------------------------------------------------------------------------------|
| Antonio 2019      | eHealth Equity Framework               | Unmet needs analysis, planning action on social determinants of health                                      | <ul style="list-style-type: none"> <li>• Identify inequities as socially-mediated factors</li> <li>• Considering how digital health can address health inequities</li> </ul>                                                                                                                                                                                           |
| Alcaraz 2017      | ConNECT Framework                      | Integrating context, inclusion, equitable diffusion of innovations, communication, and specialized training | <ul style="list-style-type: none"> <li>• Population health status: intersectionality and health disparities</li> <li>• Importance of culturally, contextually, and linguistically relevant content</li> <li>• Specialized training to ensure broader transcultural relevance</li> </ul>                                                                                |
| Nápoles 2018      | The Transcreation Framework            | Planning and delivering interventions to reduce health disparities by resonating with targeted community    | <ul style="list-style-type: none"> <li>• Integrating with community's knowledge, local programs, and participants from the beginning</li> <li>• Hiring and training community members as interventionists and study staff</li> <li>• Methods for assessing implementation processes</li> <li>• Sustaining effective programs by building community capacity</li> </ul> |
| Woodward 2019     | Health Equity Implementation Framework | Societal influence (economies, policies, sociopolitical forces)                                             | <ul style="list-style-type: none"> <li>• Societal influence on implementation (economies, policies, sociopolitical forces)</li> <li>• Assessing implementation barriers on the innovation, organizational, and patient levels</li> <li>• Collecting data on facilitators: application-based reminders, building trust, eagerness for education</li> </ul>              |

<https://doi.org/10.1371/journal.pdig.0000509.t001>

line with the original EquIR model, the DH-EquIR model contains five phases: assessing population health status and SDOH/DDOH as a starting point, planning the program, designing the program, implementing the program, and equity-focused implementation outcomes. The model culminates with a reassessment of the population health status post implementation. The text below describes each phase of DH-EquIR to give additional context.

### Population health status and determinants of health

Population health status of both the general population and the disadvantaged population should be taken into account. Population health status guides the researcher in broadly considering the inequities in a population before an intervention is designed and implemented, and evaluating how those inequities are improved as a result of a program [30]. Relatedly, SDOH such as occupation, gender, poverty, race/ethnicity, and socioeconomic condition are typically included in an assessment of population health status [30]. Digital determinants of health (DDOH) refer to access to technology, digital literacy, and community infrastructure (e.g. broadband internet) [26,39]. The DH-EquIR model emphasizes the combined importance of SDOH and DDOH in assessing population health.

### Planning the program

**Target population.** Identification of relevant research questions and the target population of interest should be the first step of planning.

**Identify disadvantaged groups.** Within the target population, identify which disadvantaged populations will potentially be impacted by the digital health implementation. Disadvantaged groups for digital health frequently include financially disadvantaged, older adults, rural populations, racial and/or ethnic minoritized populations, persons with low digital literacy, persons without access to devices and the internet, low levels of education, and persons with disabilities [41,44–46].



**Table 2. Digital Health Implementation Source Article Concepts Mapped to EquIR Concepts and Implications for Future Research.**

| EquIR-related concepts from source articles                                                           | Extracted Components                                                                                                                                                                                                                                                                                                                                                                                                                                                                                     |
|-------------------------------------------------------------------------------------------------------|----------------------------------------------------------------------------------------------------------------------------------------------------------------------------------------------------------------------------------------------------------------------------------------------------------------------------------------------------------------------------------------------------------------------------------------------------------------------------------------------------------|
| Population health status [24,26,27,39]                                                                | <ul style="list-style-type: none"> <li>• Social determinants of health</li> <li>• Digital determinants of health</li> </ul>                                                                                                                                                                                                                                                                                                                                                                              |
| Research question [22,24,40]                                                                          | <ul style="list-style-type: none"> <li>• Define: equity of what?</li> <li>• Define disadvantaged groups</li> <li>• Could technology lead to biases for or against specific population groups?</li> </ul>                                                                                                                                                                                                                                                                                                 |
| Identify disadvantaged groups [24,41,44–46,67]                                                        | <ul style="list-style-type: none"> <li>• Financial barriers/low income/lack of housing</li> <li>• Older adults</li> <li>• Rural</li> <li>• Ethnic minoritized populations</li> <li>• Unequal access to hardware, software, internet</li> <li>• Digital literacy</li> <li>• Low level of education</li> <li>• Persons with disabilities</li> <li>• Sexual orientation</li> </ul>                                                                                                                          |
| Quantify current health inequities [27,40,47,49,56]                                                   | <ul style="list-style-type: none"> <li>• Insurance coverage</li> <li>• Health literacy assessments</li> <li>• Area Deprivation Index</li> <li>• Rural Urban Commuting Area (RUCA) codes to classify rurality</li> <li>• American Community Survey (ACS) to estimate proportion of adults who attained at least a high school degree</li> <li>• Define what constitutes inequities in the context of the region through interviews with engaged community members</li> </ul>                              |
| Develop or identify equity sensitive recommendations [27,42,44,45,47,51–55,80]                        | <ul style="list-style-type: none"> <li>• Software ease of use</li> <li>• Training and assistance programs</li> <li>• Identify stressors and incorporate into scenarios for technology development</li> <li>• Define device features that ensure resilience</li> <li>• Appreciate differences between specialties</li> <li>• Tailor to the target regions</li> <li>• Human-centered design</li> </ul>                                                                                                     |
| Identify key actors for implementing equity-focus recommendations [22,38,40,51,59]                    | <ul style="list-style-type: none"> <li>• Clinicians, payers, managers, patients, caregivers</li> <li>• Engaged community members from disadvantaged populations</li> <li>• Leadership—executives, consultants</li> <li>• Regulatory approval</li> <li>• Government subsidies/grants, insurance coverage</li> <li>• Facilitator/champions</li> <li>• Vendors/engineers</li> <li>• Community health workers</li> <li>• Community advisory boards</li> <li>• Patient advisory committees</li> </ul>         |
| Identify barriers & facilitators to equity focused recommendations [22,24,25,28,41,44,45,51,52,60–63] | <ul style="list-style-type: none"> <li>• Digital literacy, internet access, hardware</li> <li>• Loaner devices</li> <li>• Credibility</li> <li>• Incorrect beliefs about medical condition</li> <li>• Preference for in-person care</li> <li>• Increased time and effort</li> <li>• Fear of using digital health</li> <li>• Lack of validation of accuracy</li> <li>• Trust, fear, discrimination, culturally insensitive behavior</li> <li>• Tools that respect cultural attributes of users</li> </ul> |
| Design a communication strategy with equity focus [25,27,46,55,67]                                    | <ul style="list-style-type: none"> <li>• Advertisements</li> <li>• Social reference</li> <li>• Patient newsletters, patient-centered social media groups, community centers, and disability groups</li> </ul>                                                                                                                                                                                                                                                                                            |
| Define resources and incentives [44,60–62]                                                            | <ul style="list-style-type: none"> <li>• Health benefits</li> <li>• Reassurance, decrease anxiety</li> <li>• Self-manage condition</li> <li>• Minimize overtreatment and maximize quality of life</li> <li>• Reduce travel</li> </ul>                                                                                                                                                                                                                                                                    |

*(Continued)*

Table 2. (Continued)

| EquiR-related concepts from source articles                                                       | Extracted Components                                                                                                                                                                                                                                                                                                                                                                                                                                                                                                                                                                                                                                                                                                                                                            |
|---------------------------------------------------------------------------------------------------|---------------------------------------------------------------------------------------------------------------------------------------------------------------------------------------------------------------------------------------------------------------------------------------------------------------------------------------------------------------------------------------------------------------------------------------------------------------------------------------------------------------------------------------------------------------------------------------------------------------------------------------------------------------------------------------------------------------------------------------------------------------------------------|
| Design strategies to overcome the identified barriers [22,27,28,42,43,45–47,51–53,57,59,68–71,73] | <ul style="list-style-type: none"> <li>• Technology support</li> <li>• Balance burden and accuracy</li> <li>• Visually intuitive</li> <li>• Test low-fidelity prototypes</li> <li>• Subsidize technology and internet</li> <li>• Asynchronous technology (should not require continuous internet access)</li> <li>• Translation features, culturally sensitive content</li> <li>• Transcreation process to culturally tailor interventions</li> <li>• Accessibility for people with disabilities (WCAG AAA guidelines)</li> <li>• Use cellular devices as opposed to Bluetooth for built in connectivity</li> <li>• Use video instead of written materials</li> <li>• Simplify text, graphics, audio</li> <li>• Volunteers to help older people learn digital health</li> </ul> |
| Define the monitoring and evaluation strategies [22,36,42,51–53]                                  | <ul style="list-style-type: none"> <li>• Clinical pathway mapping</li> <li>• User experience scales</li> <li>• Unmet needs analysis</li> <li>• Estimate cost effectiveness</li> <li>• Evaluate for data errors as result of user error</li> <li>• Web and mobile analytics software</li> <li>• Acknowledge that the impact of digital health is indirect compared to pharmaceuticals</li> </ul>                                                                                                                                                                                                                                                                                                                                                                                 |
| Sustainability [38,51,59,62,75,80]                                                                | <ul style="list-style-type: none"> <li>• Potential of text-message fatigue, individual turning off alerts</li> <li>• Interoperable platform</li> <li>• Sustainable financial model</li> </ul>                                                                                                                                                                                                                                                                                                                                                                                                                                                                                                                                                                                   |
| Coverage [81]                                                                                     | <ul style="list-style-type: none"> <li>• Telemedicine</li> <li>• RPM</li> <li>• RTM</li> <li>• Medicaid- uneven RPM coverage</li> <li>• Problems with copays</li> </ul>                                                                                                                                                                                                                                                                                                                                                                                                                                                                                                                                                                                                         |
| Implementation Cost [62]                                                                          | <ul style="list-style-type: none"> <li>• Cost savings and efficiency from using the program</li> </ul>                                                                                                                                                                                                                                                                                                                                                                                                                                                                                                                                                                                                                                                                          |
| Fidelity [45,51,56,62]                                                                            | <ul style="list-style-type: none"> <li>• Easy reminders</li> <li>• Personalized components</li> <li>• Improved communication with healthcare providers</li> </ul>                                                                                                                                                                                                                                                                                                                                                                                                                                                                                                                                                                                                               |
| Feasibility [28,42,43,45,51,56,61,67,70]                                                          | <ul style="list-style-type: none"> <li>• Access to cellphone and devices</li> <li>• Complexity of the digital health application</li> <li>• Financial means to purchase devices and service</li> <li>• Friends or family available for help</li> </ul>                                                                                                                                                                                                                                                                                                                                                                                                                                                                                                                          |
| Appropriateness [61,62,67,75,76]                                                                  | <ul style="list-style-type: none"> <li>• Attitude towards digital health</li> <li>• Digital literacy</li> <li>• Illness perception and social context (patient feels physical functioning does not align with goals of intervention)</li> <li>• Older adults' perception of messages as condescending</li> <li>• Older adults' mistrust over quality of care via digital health</li> <li>• Poor dexterity and anxiety using technology</li> </ul>                                                                                                                                                                                                                                                                                                                               |
| Adoption [61,62,67,75,76,80]                                                                      | <ul style="list-style-type: none"> <li>• Service delivery time, service quality, result demonstrability</li> <li>• Community-based support and a social learning environment</li> <li>• Personalized, comprehensive education</li> <li>• Text messaging to establish a routine</li> <li>• Two-way messaging with providers</li> <li>• Easy to integrate into daily routine</li> <li>• Relationship with healthcare providers</li> </ul>                                                                                                                                                                                                                                                                                                                                         |
| Acceptability [36,44,51,57,59,62,67,68,75,77,82]                                                  | <ul style="list-style-type: none"> <li>• Individual and comparative net benefits of technology influencing intention to use</li> <li>• Perceived usefulness, perceived ease of use, behavioral intention to use, actual system use</li> <li>• Compatibility, self-efficacy, training, habit</li> <li>• Performance expectancy, effort expectancy, social influence</li> <li>• Perceived privacy</li> <li>• Perceived cost</li> </ul>                                                                                                                                                                                                                                                                                                                                            |

<https://doi.org/10.1371/journal.pdig.0000509.t002>

Table 3. Equity issues in exemplar digital health implementation studies.

| Lead Author, Year | Equity consideration                                                                                                                                                        | Disadvantaged population                                                                   |
|-------------------|-----------------------------------------------------------------------------------------------------------------------------------------------------------------------------|--------------------------------------------------------------------------------------------|
| Alwashmi 2020     | Software ease of use, training/assistance, credibility of digital health                                                                                                    | Low digital literacy, older age, financial barriers, lack of internet                      |
| Castillo 2022     | Culturally tailored content, translations                                                                                                                                   | Spanish-speaking Latino immigrants living in the US                                        |
| Hincapie 2019     | Cost, insurance coverage, personalization, engagement, software ease of use                                                                                                 | Low-income, limited access to technology and internet                                      |
| Hossain 2019      | Advertisements, social reference, attitudes toward digital health                                                                                                           | Rural (Bangladesh), age, gender, education                                                 |
| Kirkland 2020     | Training and assistance programs, device loan programs, provide internet connectivity via cellular devices                                                                  | Race, low-income, rural                                                                    |
| Javier 2019       | Training and assistance programs, health literacy assessments, quantify health inequities (RUCA and ACS)                                                                    | Race, ethnicity, rurality, education level                                                 |
| Johnson 2020      | Barriers: incorrect belief about medical condition, increased time and effort, physical dexterity, distrust<br>Incentives: minimize overtreatment, maximize quality of life | Older age (the sample was highly educated with 79% with a bachelor's degree and 97% white) |
| Li 2022           | "High tech, high touch" model, community health worker involvement, adoption                                                                                                | Ethnicity, rurality                                                                        |
| Mantini 2020      | Feasibility, strategies to overcome barriers, provision of devices                                                                                                          | Race, ethnicity, rurality                                                                  |
| Park 2020         | Sustainability: text message fatigue, disinterest, turning off alerts                                                                                                       | Older age (the sample was mostly white (74%), college graduate (75%) and male (75%))       |
| Pekmezaris 2020   | Maximizing acceptance with cultural tailoring, improving translations                                                                                                       | Ethnicity, language for care                                                               |
| Russ 2020         | Recruiting a diverse sample for research, communication strategies, translations, culturally-sensitive content                                                              | People with disabilities, race, ethnicity                                                  |
| Russell 2021      | Identifying barriers (distance, time)                                                                                                                                       | Transgender and gender diverse minors and young adults                                     |
| Ruvalcaba 2019    | Culturally tailored interventions, transcreation process, strategies to overcome barriers                                                                                   | Spanish-speaking Latino patients                                                           |
| Slevin 2019       | Digital literacy, community-based support, education, appropriateness                                                                                                       | Technology ownership, education level, occupational status                                 |
| Valdez 2021       | Strategies to overcome barriers, recommendations for improving accessibility of digital health                                                                              | People with disabilities                                                                   |
| Wang 2020         | Identifying barriers, strategies to overcome barriers, educational programs/communication                                                                                   | Insurance, low-income                                                                      |

<https://doi.org/10.1371/journal.pdig.0000509.t003>

**Quantify current health inequities.** The population health status starting phase is the general population; while in this step work is done to more specifically measure health inequities in the target population. Methods of quantifying health inequities from the literature include digital literacy assessments, health literacy and limited English proficiency assessments, estimates of proportion of adults with at least a high school degree, and interviews with engaged community members [40,47–49]. Implementations require consideration of subgroups that will use the technology, as well as an assessment of potential biases for or against specific population groups (e.g. identifying under-represented groups not included as engaged partners that should be) [40]. The appraisal may include collecting demographics and a SDOH screener. Inequities may be identified by using a framework such as PROGRESS Plus (place of residence, race/ethnicity/culture/language, occupation, gender/sex, religion, education, socio-economic status, and social capital) [50]. Additional DDOH can be assessed by surveying specific populations about smartphone ownership and internet access, or by leveraging community-level data to examine structural barriers such as broadband internet availability. Collecting this data helps determine potential inequities in an implementation so that strategies may be developed. Note that many other assessment and measurement tools are available, this article mentions those tools found during our literature review.

**Equity-sensitive recommendations.** Program recommendations for equity-sensitive digital health implementations include focus on software ease of use, training and assistance programs, realistic scenario development, human-centered design principles, and tailoring

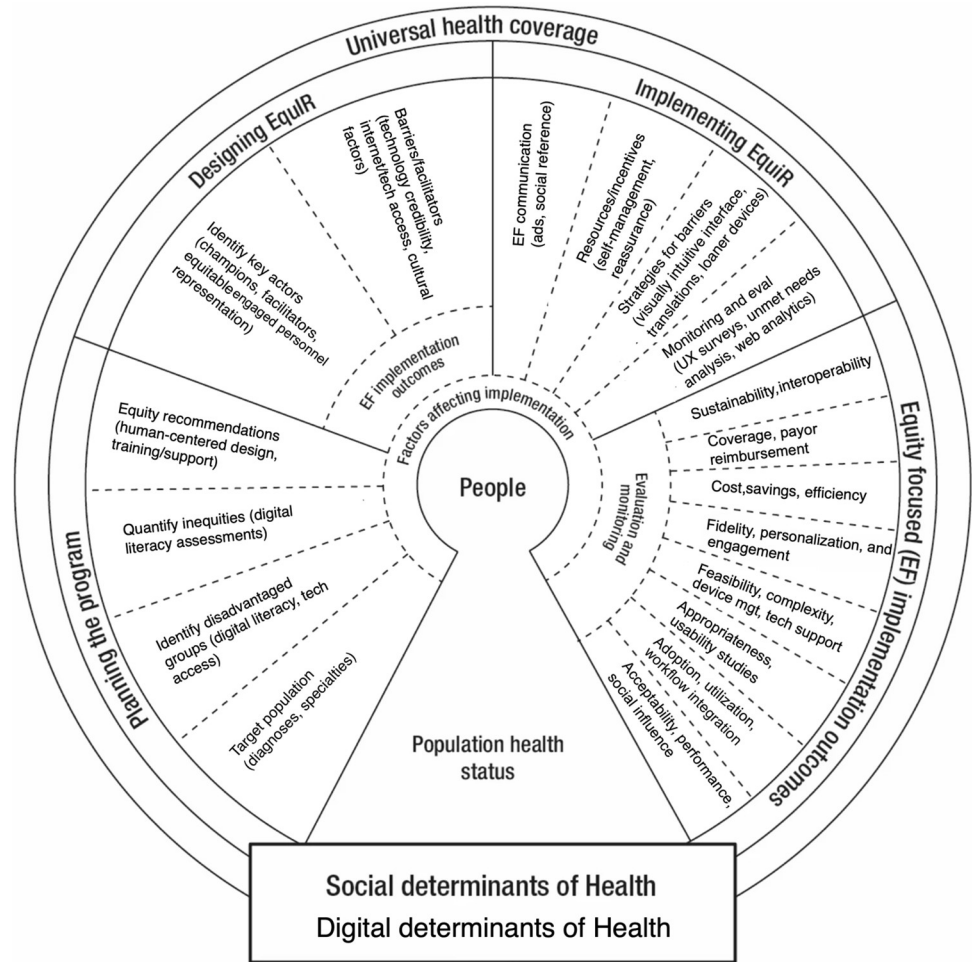

Adapted with permission from Eslava-Schmalbach et al[30] under the terms of the Creative Commons Attribution 4.0 International

**Fig 2. Digital Health Equity-focused Implementation Research Model (DH-EquIR).**

<https://doi.org/10.1371/journal.pdig.0000509.g002>

technologies to target regions [42,44,45,47,51–54]. In some cases, it may be appropriate to collaborate with social benefit programs to reach patients [55]. Cost and payor coverage must also be considered during planning [56]. Implementers should also consider community and government resources to support digital health projects such as the United States Health Resources and Services Administration’s Telehealth Resource Centers. Digital health design activities should prioritize the inclusion of disadvantaged populations that may benefit from a solution, as opposed to the mid-to-high socioeconomic users who are frequently recruited to provide feedback on initial designs. Models such as ADAPT-ITT tailor existing applications to meet the needs of target populations [57,58]. The equity checklist for health technology assessment includes additional considerations when developing a new solution [40].

### Designing the program

**Identify key actors.** The identification of key actors for digital health implementation include engaged personnel who will support the implementation, regulatory approval contacts for some forms of digital health (e.g. telemedicine visits), evaluating and contacting payors for coverage information, considering contacts for government subsidies for those who need

devices or access, and securing buy-in from healthcare executives [38,40,51,59]. Other roles that facilitate a successful implementation include effective champions and facilitators to guide the project, and responsive design and engineering teams to develop the solution [38]. It is recommended to include members from under-represented groups as engaged partners in development. Note that key actors may potentially contribute to either barriers or facilitators, depending on their view of digital health.

**Identify barriers and facilitators to equity-focused recommendations.** Potential barriers include fear of using digital health, lack of validation of accuracy of digital health, preference for in-person care, lack of care team resources, increased time and effort, and previous experiences of culturally insensitive behaviors and communication barriers [40,41,51,60–62]. Digital health may eliminate transportation requirements and increase time savings due to its remote nature and convenience [63]. Patients reported they would be more likely to use digital health if it was recommended by their provider; a facilitator of digital health credibility [44]. Including community health workers in digital health programs has shown to enable “high tech, high touch” implementation approaches [64], while community advisory boards and patient advisory committees reduce intimidation and facilitate community input [57]. In the US, India, and other countries, community health workers are a supportive role filled by persons who are not typically health professionals; they serve as a frontline advocates and educators, bridging the gap between healthcare services and underserved populations to promote and improve overall community health [65, 66]. Digital health’s ability to improve communication between patient and clinician, technology support from family or friends, and potential for saving time are other major facilitators [61]. Another facilitator is the creation of digital health tools that respect the cultural attributes of patients; such as making the tool available in languages other than English [45].

## Implementing the program

**Design an equity-focused communication strategy.** Digital health programs were found to be most effectively communicated with social reference and advertisements [67]. Social reference describes the referral of a product or service by someone an individual trusts. Advertisements may help to establish a digital health tool’s credibility. Placing adverts in patient newsletters, patient-centered social media groups, community groups, and disability groups are other communication strategies [46,55].

**Define resources and incentives.** Resources and incentives for digital health include possible health benefits for patients, reassurance from a connected care team, increased ability to self-manage a condition, and reduced travel [44,60,62]. The incentives will differ based on the target population (e.g diagnoses, medical specialties) and intervention. One example of an incentive is better control of hemoglobin a1c and long-term comorbidities in patients with diabetes.

**Define strategies to overcome the identified barriers.** Implementation teams should design strategies to overcome the barriers identified in the previous phase. Strategies include the development of visually intuitive solutions, provision of technology support, subsidization of smartphone plans and technology renting programs, inclusion of translation features, and development of accessible software interfaces [42,45–47,51,59,68–70]. Other strategies include using video instead of written materials to increase comprehension among persons with low literacy skills, simplifying text, and creating tools that respect the cultural attributes of users [43,45,47]. The transcreation process may be used to culturally tailor interventions [71]. New methodologies for precision cultural tailoring have been introduced, while others promote a better goal as usability and accessibility across multiple cultural groups [72]. To improve

accessibility of applications, compliance with technical accessibility guidelines (such as appropriate font size and color contrast) is encouraged [57,73]. Issues around device and internet access may be addressed with device loaner programs and the use of cellular devices which do not require individual data plans [52].

**Define monitoring and evaluation strategies.** Engaging targeted end-users in developing outcomes relevant to them is an important best practice to utilize when defining evaluation and monitoring strategies [74]. The impact of digital health is indirect compared to interventions such as pharmaceuticals [53]. Clinical pathway mapping defines the clinical contexts in which new technology will be used; this may serve as a foundation for health economic evaluation [53]. Other outcomes include user experience and patient satisfaction surveys, the estimation of cost effectiveness, and completion of an unmet needs analysis to support redesign of the intervention [36,53]. Digital health should be routinely evaluated for data errors as a result of human error [51]. Finally, web and mobile analytics software can be used to track engagement [42].

### Equity-focused implementation outcomes

**Sustainability and interoperability.** Digital health sustainability is enabled with sustainable financial models and interoperable platforms [38,51,59,62]. Interoperable platforms improve sustainability by removing workflow inefficiencies that drive abandonment of digital health initiatives and costly integrations that prevent many practices from sustaining digital health tools. Interoperability also impacts other implementation outcomes.

**Coverage and payor reimbursement.** Coverage involves the degree of reach, access, or effective coverage on the disadvantaged population [30]. For example, the proportion of eligible target population members who participated in the digital health program. Separately, reimbursement coverage could be impacted by Medicare, Medicaid, and private insurance coverage for particular technologies in the US. Even if not directly reimbursed by payors, implementation cost can be offset by cost savings and efficiency from digital health [62].

**Implementation costs, cost savings and efficiency.** Implementation costs should be tracked, while outcomes such as improved efficiency, avoided emergency room visits, and decreased hospital readmissions can indicate cost savings. It is also important to monitor for associated costs such as additional workforce needed to maintain the program [62].

**Fidelity, personalization, and engagement.** Fidelity is improved with patient engagement features such as easy reminders, personalized components, and improved communication with healthcare providers [42,51,56,62]. Key performance indicators may include utilization rates of features such as personalized education and clinician messaging.

**Feasibility, device management, and technical support.** Feasibility is impacted by complexity of the application, the support of friends and family, and financial factors [42,43,56,61]. The complexity of the application can be measured with usability reviews.

**Appropriateness, satisfaction surveys, and usability studies.** Appropriateness can be measured with digital literacy assessments, satisfaction surveys, and ease of use surveys [62,67,75].

**Adoption, utilization, and workflow integration.** Adoption is improved with personalized education, ease of integration into daily routines, and two-way messaging with care teams [61,62,5,76]. Acceptability includes perceived usefulness, behavioral intention to use, compatibility, perceived privacy, and perceived cost [36,37,67,77]. Integration of self-monitoring data into the care team's existing workflows enables personalized feedback to be given to the patients [64]. The act of monitoring and responding to clinical data requires a dedicated team member at the clinic, or provisions to incorporate the extra required work into a provider's limited time.



**Acceptability, performance, and social influence.** Acceptability or effectiveness is another important outcome. Web and mobile analytics software as well as qualitative inquiry can help to measure performance, social influence, and usefulness of a digital health intervention [42].

## Discussion

To the authors' knowledge, the DH-EquIR framework is the first to integrate digital health implementation concepts into the EquIR model. This is significant because conceptual models and frameworks to date are very limited in the digital health equity domain. The DH-EquIR framework serves to pragmatically guide the planning, design, implementation, and monitoring of implementation studies that deploy digital health tools into practice within underserved populations. The inclusion of digital determinants of health is an example of an adjustment to the original model. While it is still critical to evaluate SDOH throughout the implementation process, DH-EquIR encourages researchers to further consider elements such as digital literacy and access to internet. Additional elements for DDOH may include accessible content needed by persons with disabilities, or assessments of smartphone addiction in which strategies to maintain reduced screen time may be required. The inclusion of human-centered design principles in the development of equity-sensitive recommendations promotes co-design with members of underserved populations. In the identify key actors stage, the DH-EquIR model highlights the importance of including underserved population members as organizational leaders to balance power dynamics [40]. Additionally, user experience surveys and patient engagement concepts broaden the scope beyond EquIR's original bounds. The DH-EquIR framework serves to drive implementation planning and execution questions. Its practical nature allows the researcher to reference the model for ideating around potential barriers as well as solutions. The model is intentionally broad in nature, which presents challenges around specificity. Digital health applications vary in scope and complexity; the model may need to be adjusted for specific use cases.

Given the proliferation of digital health applications and the increasing reliance on internet access in daily life, it is critical to address health equity. Due to SDOH and DDOH, there are many barriers to universal digital health coverage. Without intentional consideration of health equity, digital health implementations skew towards usage in younger, wealthier populations that can afford to pay a premium on the latest devices and applications. Women, minority ethnic groups, and older people are frequently underrepresented in research, resulting in non-generalizable findings across populations [78]. Underrepresentation of these groups in digital health research studies also means that they were not included in the design of the application or device. The introduction of generative artificial intelligence into digital health increases the need for equity vigilance, as AI can perpetuate bias at scale [79]. Digital health developers and implementation specialists can use DH-EquIR to avoid repeating the same mistakes that have previously led to inequities. Planning for digital health equity improves the overall quality, usability, and allows the needs of diverse communities to be met.

Further, digital health tool development is a participatory process and involves continuous evaluation cycles intertwined with implementations that change the organization of healthcare [54]. The DH-EquIR model incorporates these tenets, as it visually depicts the cyclical nature of the development and implementation lifecycles. The DH-EquIR model can be used to identify key dimensions and factors to consider in their research study, as well as serve to remind researchers to include health-equity planning in every phase of implementation.

## Limitations

The DH-EquIR model has several limitations. First, the model requires empirical testing before being used in operational contexts. The added concepts require real world testing in

deliberate studies designed to test the model's feasibility. Only patient-focused (technologies designed for patients as opposed to clinicians) studies were included in this analysis. In addition, a single author (LG) completed the literature search, article screening, and determination of article inclusion. Due to resource restraints a higher-level review such as systematic review could not be undertaken. Other gaps include the need for further methods of measuring inequities in digital health and enforcement of standards to enable interoperable programs.

## Conclusion

Historically, digital health has not been inclusive of the needs of diverse populations. The digital divide continues to disproportionately benefit individuals not impacted by barriers such as low income, poor internet access, and lack of necessary devices. Health equity research has produced a number of helpful models and frameworks to address inequities, yet a comprehensive model incorporating digital health implementation needs from planning to measuring outcomes was lacking. The DH-EquIR model synthesized concepts from health equity models and combined them with concepts from equity-focused digital health implementation research. The model drives equitable technology implementations beginning with assessing the target population, and progressing through planning the program, designing the program, implementing the program, and measuring equity-focused implementation outcomes.

## Author Contributions

**Conceptualization:** Lisa L. Groom, Antoinette M. Schoenthaler, Devin M. Mann, Abraham A. Brody.

**Data curation:** Lisa L. Groom.

**Formal analysis:** Lisa L. Groom.

**Methodology:** Lisa L. Groom.

**Supervision:** Antoinette M. Schoenthaler, Devin M. Mann, Abraham A. Brody.

**Validation:** Abraham A. Brody.

**Visualization:** Lisa L. Groom.

**Writing – original draft:** Lisa L. Groom.

**Writing – review & editing:** Lisa L. Groom, Antoinette M. Schoenthaler, Devin M. Mann, Abraham A. Brody.

## References

1. Ware P, Ross HJ, Cafazzo JA, Boodoo C, Munnery M, Seto E. Outcomes of a heart failure telemonitoring program implemented as the standard of care in an outpatient heart function clinic: Pretest-posttest pragmatic study. *J Med Internet Res*. 2020 Feb 6; 22(2):e16538. <https://doi.org/10.2196/16538> PMID: 32027309
2. Hall C. Forecast: Health care in 2021 will focus on 'digitization of the patient experience' [Internet]. Crunchbase News. 2021 [cited 2022 Sep 20]. Available from: <https://news.crunchbase.com/startups/forecast-health-care-in-2021-will-focus-on-digitization-of-the-patient-experience/>.
3. HHS Press Office. HHS announces \$80 million in American rescue plan funding to strengthen U.S. public health IT, improve covid-19 data collection, and bolster representation of underrepresented communities in public health it workforce [Internet]. *HHS.gov*. 2021 [cited 2022 Sep 20]. Available from: <https://www.hhs.gov/about/news/2021/06/17/hhs-announces-80-million-in-arp-funding-to-bolster-underrepresented-communities-in-public-health-it-workforce.html>.

4. APTA. Remote therapeutic monitoring codes under medicare. *Am Phys Ther Assoc Mag* [Internet]. 2022; 14(2). Available from: [https://link.gale.com/apps/doc/A698832033/PPNU?u=nysl\\_me\\_newyorku&sid=bookmark-PPNU&xid=89ec1c54](https://link.gale.com/apps/doc/A698832033/PPNU?u=nysl_me_newyorku&sid=bookmark-PPNU&xid=89ec1c54).
5. Gentili A, Failla G, Melnyk A, Puleo V, Tanna GLD, Ricciardi W, et al. The cost-effectiveness of digital health interventions: A systematic review of the literature. *Front Public Health* [Internet]. 2022 [cited 2022 Sep 23];10. Available from: <https://www.frontiersin.org/articles/10.3389/fpubh.2022.787135>.
6. Meghani SH, Gallagher RM. Disparity vs inequity: Toward reconceptualization of pain treatment disparities. *Pain Med*. 2008 Jul 1; 9(5):613–23. <https://doi.org/10.1111/j.1526-4637.2007.00344.x> PMID: 18777609
7. Assari S, Chalian H, Bazargan M. Race, ethnicity, socioeconomic status, and chronic lung disease in the U.S. *Res Health Sci*. 2020; 5(1):48–63.
8. FitzGerald C, Hurst S. Implicit bias in healthcare professionals: a systematic review. *BMC Med Ethics*. 2017 Mar 1; 18:19. <https://doi.org/10.1186/s12910-017-0179-8> PMID: 28249596
9. Paradies Y, Ben J, Denson N, Elias A, Priest N, Pieterse A, et al. Racism as a determinant of health: A systematic review and meta-analysis. *PLoS ONE*. 2015 Sep 23; 10(9):e0138511. <https://doi.org/10.1371/journal.pone.0138511> PMID: 26398658
10. Office of Disease Prevention and Health Promotion. Social determinants of health literature summaries [Internet]. *Healthy People 2030*. 2022 [cited 2022 Nov 16]. Available from: <https://health.gov/healthypeople/priority-areas/social-determinants-health/literature-summaries>.
11. Hoffman LC. Reconnecting the patient: Why telehealth policy solutions must consider the deepening digital divide. *Indiana Health Law Rev*. 2022 Jul; 19(2):351–85. PMID: 36787402
12. Veinot TC, Mitchell H, Ancker JS. Good intentions are not enough: how informatics interventions can worsen inequality. *J Am Med Inform Assoc*. 2018 Aug 1; 25(8):1080–8. <https://doi.org/10.1093/jamia/ocy052> PMID: 29788380
13. Brewer LC, Fortuna KL, Jones C, Walker R, Hayes SN, Patten CA, et al. Back to the future: Achieving health equity through health informatics and digital health. *JMIR MHealth UHealth*. 2020 Jan 14; 8(1):e14512. <https://doi.org/10.2196/14512> PMID: 31934874
14. Sjoding MW, Dickson RP, Iwashyna TJ, Gay SE, Valley TS. Racial bias in pulse oximetry measurement. *N Engl J Med*. 2020 Dec 17; 383(25):2477–8. <https://doi.org/10.1056/NEJMc2029240> PMID: 33326721
15. Moran-Thomas A. How a popular medical device encodes racial bias [Internet]. *Boston Review*. [cited 2022 Nov 14]. Available from: <https://www.bostonreview.net/articles/amy-moran-thomas-pulse-oximeter/>.
16. Hankerson D, Marshall AR, Booker J, Elmimouni H, Walker I, Rode JA. Does Technology Have Race? In: *Proceedings of the 2016 CHI Conference Extended Abstracts on Human Factors in Computing Systems* [Internet]. San Jose California USA: ACM; 2016 [cited 2024 Mar 11]. p. 473–86. Available from: <https://dl.acm.org/doi/10.1145/2851581.2892578>.
17. Harrington CN, Ruzic L, Sanford JA. Universally accessible mHealth apps for older adults: Towards increasing adoption and sustained engagement. In: Antona M, Stephanidis C, editors. *Universal Access in Human–Computer Interaction Human and Technological Environments*. Cham: Springer International Publishing; 2017. p. 3–12. (Lecture Notes in Computer Science).
18. Huh J, Koola J, Contreras A, Castillo AKP, Ruiz M, Tedone KG, et al. Consumer health informatics adoption among underserved populations: Thinking beyond the digital divide. *Yearb Med Inform*. 2018 Aug; 27(1):146–55. <https://doi.org/10.1055/s-0038-1641217> PMID: 30157518
19. Schillinger D. The intersections between social determinants of health, health literacy, and health disparities. *Stud Health Technol Inform*. 2020 Jun 25; 269:22–41. <https://doi.org/10.3233/SHTI200020> PMID: 32593981
20. Pathak LE, Aguilera A, Williams JJ, Lyles CR, Hernandez-Ramos R, Miramontes J, et al. Developing messaging content for a physical activity smartphone app tailored to low-income patients: User-centered design and crowdsourcing approach. *JMIR MHealth UHealth*. 2021 May 19; 9(5):e21177. <https://doi.org/10.2196/21177> PMID: 34009130
21. Henni SH, Maurud S, Fuglerud KS, Moen A. The experiences, needs and barriers of people with impairments related to usability and accessibility of digital health solutions, levels of involvement in the design process and strategies for participatory and universal design: a scoping review. *BMC Public Health*. 2022 Jan 6; 22(1):1–18.
22. Nápoles AM, Stewart AL. Transcreation: an implementation science framework for community-engaged behavioral interventions to reduce health disparities. *BMC Health Serv Res*. 2018 Sep 12; 18:710. <https://doi.org/10.1186/s12913-018-3521-z> PMID: 30208873

23. Nadal C, Sas C, Doherty G. Technology Acceptance in Mobile Health: Scoping Review of Definitions, Models, and Measurement. *J Med Internet Res*. 2020 Jul 6; 22(7):e17256. <https://doi.org/10.2196/17256> PMID: 32628122
24. Antonio MG, Petrovskaya O. Towards developing an eHealth equity conceptual framework. In IOS Press; 2019 [cited 2022 Sep 20]. p. 24–30. Available from: <http://proxy.library.nyu.edu/login?url=https://search.ebscohost.com/login.aspx?direct=true&db=edsbl&AN=CN605237470&site=eds-live>. PMID: 30741167
25. Bodie G, Dutta M. Understanding health literacy for strategic health marketing: eHealth literacy, health disparities, and the digital divide. *Health Mark Q*. 2008 Aug; 25(1/2):175–203. <https://doi.org/10.1080/07359680802126301> PMID: 18935884
26. Crawford A, Serhal E. Digital health equity and covid-19: The innovation curve cannot reinforce the social gradient of health. *J Med Internet Res*. 2020 Jun 2; 22(6):e19361. <https://doi.org/10.2196/19361> PMID: 32452816
27. Alcaraz KI, Sly J, Ashing K, Fleisher L, Gil-Rivas V, Ford S, et al. The ConNECT Framework: a model for advancing behavioral medicine science and practice to foster health equity. *J Behav Med*. 2017 Feb; 40(1):23–38. <https://doi.org/10.1007/s10865-016-9780-4> PMID: 27509892
28. Woodward EN, Matthieu MM, Uchendu US, Rogal S, Kirchner JE. The health equity implementation framework: proposal and preliminary study of hepatitis C virus treatment. *Implement Sci*. 2019 Mar 12; 14(1):26. <https://doi.org/10.1186/s13012-019-0861-y> PMID: 30866982
29. Strifler L, Cardoso R, McGowan J, Cogo E, Nincic V, Khan PA, et al. Scoping review identifies significant number of knowledge translation theories, models, and frameworks with limited use. *J Clin Epidemiol*. 2018 Aug; 100:92–102. <https://doi.org/10.1016/j.jclinepi.2018.04.008> PMID: 29660481
30. Eslava-Schmalbach J, Garzón-Orjuela N, Elias V, Reveiz L, Tran N, Langlois EV. Conceptual framework of equity-focused implementation research for health programs (EquiR). *Int J Equity Health*. 2019 May 31; 18(1):80. <https://doi.org/10.1186/s12939-019-0984-4> PMID: 31151452
31. Damschroder LJ, Aron DC, Keith RE, Kirsh SR, Alexander JA, Lowery JC. Fostering implementation of health services research findings into practice: a consolidated framework for advancing implementation science. *Implement Sci*. 2009 Aug 7; 4(1):50.
32. Nkimbeng M, Han HR, Szanton SL, Alexander KA, Davey-Rothwell M, Giger JT, Gitlin LN, Joo JH, Koeuth S, Marx KA, Mingo CA, Samuel LJ, Taylor JL, Wenzel J, Parisi JM. Exploring challenges and strategies in partnering with community-based organizations to advance intervention development and implementation with older adults. *The Gerontologist*. 2021 Dec 27;gnab190.
33. Baethge C, Goldbeck-Wood S, Mertens S. SANRA—a scale for the quality assessment of narrative review articles. *Res Integr Peer Rev*. 2019 Mar 26; 4(1):5. <https://doi.org/10.1186/s41073-019-0064-8> PMID: 30962953
34. Sukhera J. Narrative Reviews in Medical Education: Key Steps for Researchers. *J Grad Med Educ*. 2022 Aug; 14(4):418–9. <https://doi.org/10.4300/JGME-D-22-00481.1> PMID: 35991097
35. National Library of Medicine. MEDLINE®/PubMed® Health Disparities and Minority Health Search Strategy [Internet]. U. S. National Library of Medicine; 2019 [cited 2023 May 18]. Available from: [https://www.nlm.nih.gov/services/queries/health\\_disparities\\_details.html](https://www.nlm.nih.gov/services/queries/health_disparities_details.html).
36. Davis F. Perceived usefulness, perceived ease of use, and user acceptance of information technology. *MIS Q*. 1989; 13(3):319.
37. Venkatesh Thong, Xu. Consumer acceptance and use of information technology: Extending the unified theory of acceptance and use of technology. *MIS Q*. 2012; 36(1):157.
38. Schoville RR, Titler MG. Guiding healthcare technology implementation: A new integrated technology implementation model. *CIN Comput Inform Nurs*. 2015 Mar; 33(3):99–107. <https://doi.org/10.1097/CIN.000000000000130> PMID: 25799235
39. Richardson S, Lawrence K, Schoenthaler AM, Mann D. A framework for digital health equity. *NPJ Digit Med*. 2022 Aug 18; 5:119. <https://doi.org/10.1038/s41746-022-00663-0> PMID: 35982146
40. Benkhalti M, Espinoza M, Cookson R, Welch V, Tugwell P, Dagenais P. Development of a checklist to guide equity considerations in health technology assessment. *Int J Technol Assess Health Care*. 2021; 37(1):e17. <https://doi.org/10.1017/S0266462320002275> PMID: 33491618
41. Ramasawmy M, Poole L, Thorlu-Bangura Z, Chauhan A, Murali M, Jagpal P, et al. Frameworks for implementation, uptake, and use of cardiometabolic disease-related digital health interventions in ethnic minority populations: Scoping review. *JMIR Cardio*. 2022 Aug 11; 6(2):e37360. <https://doi.org/10.2196/37360> PMID: 35969455
42. Grossman LV, Masterson Creber RM, Benda NC, Wright D, Vawdrey DK, Ancker JS. Interventions to increase patient portal use in vulnerable populations: a systematic review. *J Am Med Inform Assoc*. 2019 Aug 1; 26(8–9):855–70. <https://doi.org/10.1093/jamia/ocz023> PMID: 30958532

43. Montague E, Perchonok J. Health and wellness technology use by historically underserved health consumers: Systematic review. *J Med Internet Res*. 2012 May 31; 14(3):e78. <https://doi.org/10.2196/jmir.2095> PMID: 22652979
44. Alwashmi MF, Fitzpatrick B, Farrell J, Gamble JM, Davis E, Nguyen HV, et al. Perceptions of patients regarding mobile health interventions for the management of chronic obstructive pulmonary disease: Mixed methods study. *JMIR MHealth UHealth*. 2020 Jul 23; 8(7):e17409. <https://doi.org/10.2196/17409> PMID: 32706697
45. Latulippe K, Hamel C, Giroux D. Social health inequalities and eHealth: A literature review with qualitative synthesis of theoretical and empirical studies. *J Med Internet Res*. 2017 Apr 27; 19(4):e6731. <https://doi.org/10.2196/jmir.6731> PMID: 28450271
46. Russ S, Latif Z, Hazell AL, Ogunmuyiwa H, Tapper J, Wachuku-King S, et al. Smartphone App Designed to Empower Patients to Contribute Toward Safer Surgical Care: Community-Based Evaluation Using a Participatory Approach. *JMIR MHealth UHealth*. 2020 Jan 20; 8(1):e12859.
47. Javier SJ, Troszak LK, Shimada SL, McInnes DK, Ohl ME, Avoundjian T, et al. Racial and ethnic disparities in use of a personal health record by veterans living with HIV. *J Am Med Inform Assoc*. 2019 Aug 1; 26(8–9):696–702. <https://doi.org/10.1093/jamia/ocz024> PMID: 30924875
48. Chesser A, Burke A, Reyes J, Rohrberg T. Navigating the digital divide: A systematic review of eHealth literacy in underserved populations in the United States. *Inform Health Soc Care*. 2016; 41(1):1–19. <https://doi.org/10.3109/17538157.2014.948171> PMID: 25710808
49. Kind AJH, Jencks S, Brock J, Yu M, Bartels C, Ehlenbach W, et al. Neighborhood socioeconomic disadvantage and 30-day rehospitalization: a retrospective cohort study. *Ann Intern Med*. 2014 Dec 2; 161(11):765–74. <https://doi.org/10.7326/M13-2946> PMID: 25437404
50. O'Neill J, Tabish H, Welch V, Petticrew M, Pottie K, Clarke M, et al. Applying an equity lens to interventions: using PROGRESS ensures consideration of socially stratifying factors to illuminate inequities in health. *J Clin Epidemiol*. 2014 Jan 1; 67(1):56–64. <https://doi.org/10.1016/j.jclinepi.2013.08.005> PMID: 24189091
51. Whitelaw S, Pellegrini DM, Mamas MA, Cowie M, Van Spall HGC. Barriers and facilitators of the uptake of digital health technology in cardiovascular care: a systematic scoping review. *Eur Heart J Digit Health*. 2021 Feb 4; 2(1):62–74. <https://doi.org/10.1093/ehjdh/ztab005> PMID: 34048508
52. Kirkland EB, Marsden J, Zhang J, Schumann SO, Bian J, Mauldin P, et al. Remote patient monitoring sustains reductions of hemoglobin A1c in underserved patients to 12 months. *Prim Care Diabetes [Internet]*. 2021 Jan 25 [cited 2021 Feb 26]; Available from: <https://www.sciencedirect.com/science/article/pii/S175199182100005X>. <https://doi.org/10.1016/j.pcd.2021.01.005> PMID: 33509728
53. Borsci S, Uchegbu I, Buckle P, Ni Z, Walne S, Hanna GB. Designing medical technology for resilience: integrating health economics and human factors approaches. *Expert Rev Med Devices*. 2018 Jan 2; 15(1):15–26. <https://doi.org/10.1080/17434440.2018.1418661> PMID: 29243500
54. Gemert-Pijnen JE van, Nijland N, van Limburg M, Ossebaard HC, Kelders SM, Eysenbach G, et al. A holistic framework to improve the uptake and impact of ehealth technologies. *J Med Internet Res*. 2011 Dec 13; 13(4):e1672. <https://doi.org/10.2196/jmir.1672> PMID: 22155738
55. Wang L, Ren J, Fiscella KA, Bullock S, Sanders MR, Loomis EL, et al. Interprofessional collaboration and smartphone use as promising strategies to improve prenatal oral health care utilization among US underserved women: results from a qualitative study. *BMC Oral Health*. 2020 Nov 23; 20(1):333. <https://doi.org/10.1186/s12903-020-01327-9> PMID: 33228617
56. Hincapie A, Gupta V, Brown S, Metzger A. Exploring perceived barriers to medication adherence and the use of mobile technology in underserved patients with chronic conditions. *J Pharm Pract*. 2019; 32(2):147–53. <https://doi.org/10.1177/0897190017744953> PMID: 29212410
57. Pekmezaris R, Williams MS, Pascarelli B, Finuf KD, Harris YT, Myers AK, et al. Adapting a home telemonitoring intervention for underserved Hispanic/Latino patients with type 2 diabetes: an acceptability and feasibility study. *BMC Med Inform Decis Mak*. 2020 Dec 7; 20(1):324. <https://doi.org/10.1186/s12911-020-01346-0> PMID: 33287815
58. Wingood GM, DiClemente RJ. The ADAPT-ITT model: A novel method of adapting evidence-based HIV interventions. *JAIDS J Acquir Immune Defic Syndr*. 2008 Mar 1; 47:S40. <https://doi.org/10.1097/QAI.0b013e3181605df1> PMID: 18301133
59. Espay AJ, Hausdorff JM, Sanchez-Ferro Á, Klucken J, Merola A, Bonato P, et al. A roadmap for implementation of patient-centered digital outcome measures in Parkinson's disease obtained using mobile health technologies. *Mov Disord Off J Mov Disord Soc*. 2019 May; 34(5):657–63. <https://doi.org/10.1002/mds.27671> PMID: 30901495
60. Khalil C. Understanding the adoption and diffusion of a telemonitoring solution in gestational diabetes mellitus: Qualitative study. *JMIR Diabetes*. 2019 Nov 28; 4(4):e13661. <https://doi.org/10.2196/13661> PMID: 31778118



61. Johnson A, Shukla N, Halley M, Nava V, Budaraju J, Zhang L, et al. Barriers and facilitators to mobile health and active surveillance use among older adults with skin disease. *Health Expect Int J Public Particip Health Care Health Policy*. 2021 Oct; 24(5):1582–92. <https://doi.org/10.1111/hex.13229> PMID: 34190397
62. Palacholla RS, Fischer N, Coleman A, Agboola S, Kirley K, Felsted J, et al. Provider- and patient-related barriers to and facilitators of digital health technology adoption for hypertension management: Scoping review. *JMIR Cardio*. 2019 Mar 26; 3(1):e11951. <https://doi.org/10.2196/11951> PMID: 31758771
63. Russell MR, Rogers RL, Rosenthal SM, Lee JY. Increasing access to care for transgender/gender diverse youth using telehealth: A quality improvement project. *Telemed E-Health*. 2022 Jun; 28(6):847–57. <https://doi.org/10.1089/tmj.2021.0268> PMID: 34637658
64. Li Y, Wu FX, Ngom A. A review on machine learning principles for multi-view biological data integration. *Brief Bioinform*. 2018 Mar 1; 19(2):325–40. <https://doi.org/10.1093/bib/bbw113> PMID: 28011753
65. O'Donovan JO'Donovan C, Kuhn I, Sachs SE, Winters N. Ongoing training of community health workers in low-income and middle-income countries: a systematic scoping review of the literature. *BMJ Open*. 2018 Apr; 8(4):e021467. <https://doi.org/10.1136/bmjopen-2017-021467> PMID: 29705769
66. Gopalakrishnan L, Buback L, Fernald L, Walker D, Diamond-Smith N, Consortium in addition to TCE. Using mHealth to improve health care delivery in India: A qualitative examination of the perspectives of community health workers and beneficiaries. *PLOS ONE*. 2020 Jan 15; 15(1):e0227451.
67. Hossain N, Yokota F, Sultana N, Ahmed A. Factors influencing rural end-users' acceptance of eHealth in developing countries: A study on portable health clinic in Bangladesh. *Telemed J E Health*. 2019 Mar 1; 25(3):221–9. <https://doi.org/10.1089/tmj.2018.0039> PMID: 29664328
68. Hess TJ, Joshi K, McNab AL. An alternative lens for understanding technology acceptance: An equity comparison perspective. *J Organ Comput Electron Commer*. 2010 Apr 30; 20(2):123–54.
69. Castillo AF, Davis AL, Krishnamurti T. Using implementation science frameworks to translate and adapt a pregnancy app for an emerging Latino community. *BMC Womens Health*. 2022 Sep 21; 22(1):386. <https://doi.org/10.1186/s12905-022-01975-9> PMID: 36131336
70. Mantini N, Borne RT, Varosy PD, Rosenberg MA, Marzec LN, Sauer WH, et al. Use of cell phone adapters is associated with reduction in disparities in remote monitoring of cardiac implantable electronic devices. *J Interv Card Electrophysiol Int J Arrhythm Pacing*. 2021 Apr; 60(3):469–75. <https://doi.org/10.1007/s10840-020-00743-9> PMID: 32399863
71. Ruvalcaba D, Nagao Peck H, Lyles C, Uratsu CS, Escobar PR, Grant RW. Translating/creating a culturally responsive spanish-language mobile app for visit preparation: Case study of “trans-creation.” *JMIR MHealth UHealth*. 2019 Apr 5; 7(4):e12457.
72. Kim MT, Heitkemper EM, Hébert ET, Hecht J, Crawford A, Nnaka T, et al. Redesigning culturally tailored intervention in the precision health era: Self-management science context. *Nurs Outlook*. 2022 Sep 1; 70(5):710–24. <https://doi.org/10.1016/j.outlook.2022.05.015> PMID: 35933178
73. Valdez RS, Rogers CC, Claypool H, Trieschmann L, Frye O, Wellbeloved-Stone C, et al. Ensuring full participation of people with disabilities in an era of telehealth. *J Am Med Inform Assoc JAMIA*. 2020 Nov 18; 28(2):389–92.
74. Patient-Centered Outcomes Research Institute. Engagement in Research: PCORI's Foundational Expectations for Partnerships [Internet]. PCORI; 2024 [cited 2024 Mar 25]. Available from: <https://www.pcori.org/engagement/engagement-resources/engagement-research-pcoris-foundational-expectations-partnerships>.
75. Park LG, Ng F, K Shim J, Elnaggar A, Villero O. Perceptions and experiences of using mobile technology for medication adherence among older adults with coronary heart disease: A qualitative study. *Digit Health*. 2020 May 20; 6:2055207620926844. <https://doi.org/10.1177/2055207620926844> PMID: 32489672
76. Slevin P, Kessie T, Cullen J, Butler MW, Donnelly SC, Caulfield B. A qualitative study of chronic obstructive pulmonary disease patient perceptions of the barriers and facilitators to adopting digital health technology. *Digit Health*. 2019 Aug 25; 5:2055207619871729. <https://doi.org/10.1177/2055207619871729> PMID: 31489206
77. Rahimi B, Nadri H, Lotfnezhad Afshar H, Timpka T. A systematic review of the technology acceptance model in health informatics. *Appl Clin Inform*. 2018 Jul; 9(3):604–34. <https://doi.org/10.1055/s-0038-1668091> PMID: 30112741
78. Ibrahim H. Health data poverty: an assailable barrier to equitable digital health care. *Lancet Digi T Health* 2021. 2021 Mar 4; 6. [https://doi.org/10.1016/S2589-7500\(20\)30317-4](https://doi.org/10.1016/S2589-7500(20)30317-4) PMID: 33678589
79. Gallifant J, Nakayama LF, Gichoya JW, Pierce R, Celi LA. Equity should be fundamental to the emergence of innovation. *PLOS Digit Health*. 2023 Apr 10; 2(4):e0000224. <https://doi.org/10.1371/journal.pdig.0000224> PMID: 37036866



80. Li S, Yin Z, Lesser J, Li C, Choi BY, Parra-Medina D, et al. Community health worker-led mHealth-enabled diabetes self-management education and support intervention in rural Latino adults: Single-arm feasibility trial. *JMIR Diabetes*. 2022 May 30; 7(2):e37534. <https://doi.org/10.2196/37534> PMID: 35635752
81. Center for Connected Health Policy. Telehealth Policy Trend Maps [Internet]. CCHP. 2023 [cited 2023 Feb 14]. Available from: <https://www.cchpca.org/policy-trends/>.
82. Venkatesh V, Thong JYL, Xin Xu. Unified theory of acceptance and use of technology: A synthesis and the road ahead. *J Assoc Inf Syst*. 2016 May; 17(5):328–76.
